# Supplementary material
Source: PubMed Central journal article supplement (PMC4390636)
Supplement: JCM.03609-14_zjm999094082so2.pdf [file JCM.03609-14_zjm999094082so2.pdf]

### **Supplemental References list.**

1. **Cohen-Bacrie S, Ninove L, Nougairede A, Charrel R, Richet H, Minodier P, Badiaga S, Noël G, La Scola B, de Lamballerie X, Drancourt M, Raoult D.** 2011. Revolutionizing clinical microbiology laboratory organization in hospitals with in situ point-of-care. *PLoS One.* **6**:e22403.
2. **Shannon KE, Lee DY, Trevors JT, Beaudette LA.** 2007. Application of real-time quantitative PCR for the detection of selected bacterial pathogens during municipal wastewater treatment. *Sci Total Environ* **382**:121-9
